# Supplementary material for: A Presurgical Unfavorable Prediction Scale of Endovascular Treatment for Acute Ischemic Stroke
Source: Frontiers journal article supplement (doi:10.3389/fnagi.2022.942285), 2022-06-30

## **Supplementary Materials**

**Supplementary Table 1. Summary of treatments, secondary end point events and security indicator events.** sICH, Symptomatic Intracranial Hemorrhage; mTICI, modified Treatment in Cerebral Infarction score; ALT, Alanine transaminase; AST, Aspartate aminotransferase. Favorable outcome group versus unfavorable outcome group,  $*P<0.05$ ,  $**P<0.01$ ,  $***P<0.001$ .

**Supplementary Table 2. The summary of evaluation metrics for each algorithm.**

**Supplementary Table 3. The effect of age on long-term outcome in EVT for AIS.**

Different age groups comparison ( $> 67$  y group VS  $\leq 67$  group),  $***P<0.001$ .

**Supplementary Table 4. The effect of NIHSS score on long-term outcome in EVT for AIS.** Different NIHSS scores groups comparison ( $> 14$  scores group VS  $\leq 14$  scores group),  $***P<0.001$ .

**Supplementary Table 5. Effect of different score segments in prediction scale on prognosis of EVT for AIS.** Different prediction scale scores groups comparison ( $> 3$  scores group VS  $\leq 3$  scores group),  $***P<0.001$ .

**Supplementary Figure 1. Distribution of 90d mRS of EVT for AIS in 169 patients in 2021.**

**Supplementary Figure 2. ROC curve of the prediction scale for predicting outcomes after EVT for AIS in 973 patients from January 2018 to December 2020.**

**Supplementary Table 1. Summary of treatments, secondary end point events and security indicator events.**

|                                                                | postoperative<br>mRS(0-2) | postoperative<br>mRS (3-6) | P (Value) |
|----------------------------------------------------------------|---------------------------|----------------------------|-----------|
| Treatments                                                     |                           |                            |           |
| Number of mechanical thrombectomy,<br>n, median (IQR)          | 2.0<br>(1.0-2.0)          | 2.0<br>(1.0-3.0)           | <0.001*** |
| Local anesthesia, n (%)                                        | 338(96.3%)                | 570(91.6%)                 | 0.005**   |
| General anesthesia, n (%)                                      | 13(3.7%)                  | 52(8.4%)                   |           |
| Time from Puncture to reperfusion,<br>min, median (IQR)        | 60.0<br>(40.0-90.75)      | 85.0<br>(55.0-120.0)       | <0.001*** |
| Time from onset to reperfusion, min,<br>median (IQR)           | 392.0<br>(285.0-533.8)    | 405.0<br>(301.2-540.0)     | 0.416     |
| Operation mode                                                 |                           |                            |           |
| Aspiration, n (%)                                              | 9(2.6%)                   | 13(2.1%)                   | 0.493     |
| Stent retriever only, n (%)                                    | 56(16.0%)                 | 95(15.3%)                  |           |
| Stent retriever and aspiration, n (%)                          | 262(74.6%)                | 485(78.0%)                 |           |
| Balloon dilatation, n (%)                                      | 12(3.4%)                  | 18(2.9%)                   |           |
| Others, n (%)                                                  | 12(3.4%)                  | 18(1.8%)                   |           |
| Blood pressure parameters                                      |                           |                            |           |
| Intraoperative mean arterial pressure<br>(mmHg), median (IQR)  | 101.0<br>(93.0-110.0)     | 102.0<br>(93.0-110.8)      | 0.482     |
| Mean arterial pressure within 24 hours<br>(mmHg), median (IQR) | 92.0<br>(83.0-99.0)       | 94.0<br>(86.0-102.0)       | <0.001*** |
| Surgical complications                                         |                           |                            |           |
| sICH, n (%)                                                    | 52(14.8%)                 | 171(27.5%)                 | <0.001*** |
| Contrast medium leakage, n (%)                                 | 51(14.5%)                 | 116(18.6%)                 | 0.102     |
| Reperfusion injury, n (%)                                      | 48(13.7%)                 | 215(34.6%)                 | <0.001*** |
| Antiplatelet plate drugs after 24 hours                        |                           |                            |           |
| Aspirin, n (%)                                                 | 70 (19.9%)                | 122 (19.6%)                | <0.001*** |
| Clopidogrel, n (%)                                             | 27 (7.7%)                 | 42 (6.8%)                  |           |
| Aspirin+Clopidogrel, n (%)                                     | 216 (62.5%)               | 267 (42.9%)                |           |
| Others, n (%)                                                  | 38 (10.9%)                | 191 (30.7%)                |           |
| Tirofiban used within 24 hours, n (%)                          | 231 (65.8%)               | 358(57.6%)                 | 0.011*    |
| Other events                                                   |                           |                            |           |
| Myocardial infarction, n (%)                                   | 11(3.1%)                  | 28(4.5%)                   | 0.296     |
| Gastrointestinal bleeding, n (%)                               | 5(1.4%)                   | 23(3.7%)                   | 0.042*    |
| Epistaxis, n (%)                                               | 1(0.3%)                   | 2(0.3%)                    | 0.999     |
| Infection, n (%)                                               | 143(40.7%)                | 383(61.6%)                 | <0.001*** |
| Laboratory test                                                |                           |                            |           |
| ALT (U/L), median (IQR)                                        | 15.5 (9.7-25.0)           | 17.0 (9.5-27.0)            | 0.266     |
| AST (U/L), median (IQR)                                        | 19.0 (13.8-26.0)          | 23.0 (14.0-32.0)           | <0.001*** |
| Reperfusion after intervention (mTICI)                         |                           |                            |           |
| 0-2a, n (%)                                                    | 24(6.8%)                  | 107(17.2%)                 | <0.001*** |
| 2b-3, n (%)                                                    | 327(93.2%)                | 515(82.8%)                 |           |

**Supplementary Table 2. The summary of evaluation metrics for each algorithm.**

| Algorithms | Accuracy [%] | Precision [%] | Recall [%] | F1    | AUC   |
|------------|--------------|---------------|------------|-------|-------|
| LGBM       | 73.77        | 73.16         | 75.18      | 74.09 | 0.824 |
| LR         | 70.09        | 84.27         | 65.43      | 73.67 | 0.795 |

**Supplementary Table 3. The effect of age on long-term outcome in EVT for AIS.**

| Age (y) | Favorable outcome in<br>90d mRS (n [%]) | Unfavorable outcome<br>in 90d mRS (n [%]) | Total patients<br>(n [%]) | OR (95%CI)       | P (Value) |
|---------|-----------------------------------------|-------------------------------------------|---------------------------|------------------|-----------|
| ≤67     | 202 [51.5%]                             | 190 [48.5%]                               | 392 [40.3%]               | 1                | -         |
| > 67    | 149 [25.6 %]                            | 432 [74.4%]                               | 581 [59.7%]               | 3.08 (2.35-4.04) | <0.001*** |

Different age groups comparison ( > 67 y group VS ≤67 group), \*\*\* $P<0.001$ .

**Supplementary Table 4. The effect of NIHSS score on long-term outcome in EVT for AIS.**

| NIHSS Score | Favorable outcome in 90d mRS (n [%]) | Unfavorable outcome in 90d mRS (n [%]) | Total patients (n [%]) | OR (95%CI)       | P (Value) |
|-------------|--------------------------------------|----------------------------------------|------------------------|------------------|-----------|
| ≤14         | 240 [52.7%]                          | 215 [47.3%]                            | 455 [46.8%]            | 1                | -         |
| > 14        | 111 [21.4%]                          | 407 [78.6%]                            | 518 [53.2%]            | 4.09 (3.10-5.41) | <0.001*** |

Different NIHSS scores groups comparison ( > 14 scores group VS ≤14 scores group), \*\*\* $P<0.001$ .

**Supplementary Table 5. Effect of different score segments in prediction scale on prognosis of EVT for AIS.**

| Prediction Scale | Favorable outcome in 90d mRS (n [%]) | Unfavorable outcome in 90d mRS (n [%]) | Total patients (n [%]) | OR (95%CI)       | P (Value) |
|------------------|--------------------------------------|----------------------------------------|------------------------|------------------|-----------|
| ≤3               | 199 [62.0%]                          | 122 [38.0%]                            | 321 [34.0%]            | 1                | -         |
| > 3              | 152[23.31%]                          | 500 [76.7%]                            | 652 [67.0%]            | 5.36 (4.19-6.88) | <0.001    |

Different prediction scale scores groups comparison ( > 3 scores group VS ≤3 scores group), \*\*\* $P<0.001$ .

**Supplementary Figure 1. Distribution of 90d mRS of EVT for AIS in 169 patients in 2021.**

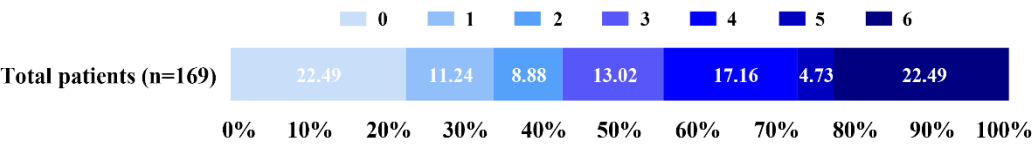

**Supplementary Figure 2. ROC curve of the prediction scale for predicting outcomes after EVT for AIS in 973 patients from January 2018 to December 2020.**

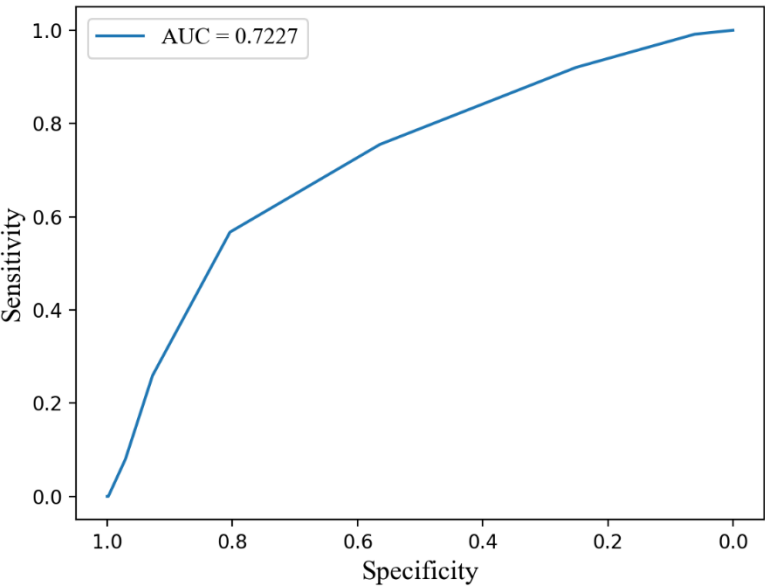

Supplement: Presentation_1.pdf [file Presentation_1.pdf]
